# Supplementary material
Source: publisher figshare collection journal article supplement (https://acs.figshare.com/ndownloader/files/4360201)
Supplement: Supplementary file 1 [file 4360201]

## Supporting Information

### **Multifunctional Iron-Carbon Nanocomposites through an Aerosol-Based Process for the *In Situ* Remediation of Chlorinated Hydrocarbons**

Jingjing Zhan,<sup>†,\*</sup> Igor Kolesnichenko,<sup>†</sup> Bhanukiran Sunkara,<sup>†</sup> Jibao He,<sup>‡</sup> Gary L. McPherson,<sup>§</sup> Gerhard Piringer,<sup>||</sup> and Vijay T. John <sup>†,\*</sup>

<sup>†</sup> Department of Chemical and Biomolecular Engineering, Tulane University, New Orleans LA 70118

<sup>‡</sup> Coordinated Instrumentation Facility, Tulane University, New Orleans LA 70118

<sup>§</sup> Department of Chemistry, Tulane University, New Orleans LA 70118

<sup>||</sup> Department of Earth and Environmental Sciences, Tulane University, New Orleans LA 70118

\* Corresponding author. Email: [vj@tulane.edu](mailto:vj@tulane.edu). Phone: (504) 865-5883. Fax: (504) 865-6744.

Number of Pages (Including Cover): 6

Number of Figures: 2

### *XRD and XPS analysis*

X-ray diffraction pattern of as-synthesized Fe/C is shown in Figure S1. The peak centered at  $26.6^\circ$  corresponds to the (002) graphite-like reflection of carbon and its broadening suggests the possible presence of an amorphous phase within the carbon spheres (1). Peaks at the  $2\theta$  of  $44.9^\circ$  (110),  $65^\circ$  (200) and  $82.3^\circ$  (211) indicate the presence of zero-valent iron. In addition, the peak centered at  $35.9^\circ$  attributes to iron oxide (FeO) crystalline phases due to an oxidized layer. We also carried out XPS studies to verify the presence of zero-valent iron in the sample. In the experiment, the aerosol-based Fe/C sample was spread on a carbon tape. As shown in Figure S2, photoelectron peaks at 710.0 eV and 723.3 eV are related to the binding energies of Fe ( $2p_{3/2}$ ) and Fe ( $2p_{1/2}$ ) of iron oxide. Importantly, the shoulder at a binding energy of 706.6 eV represents the  $2p_{3/2}$  peak of zero-valent iron, which is identical to those previously reported (2).

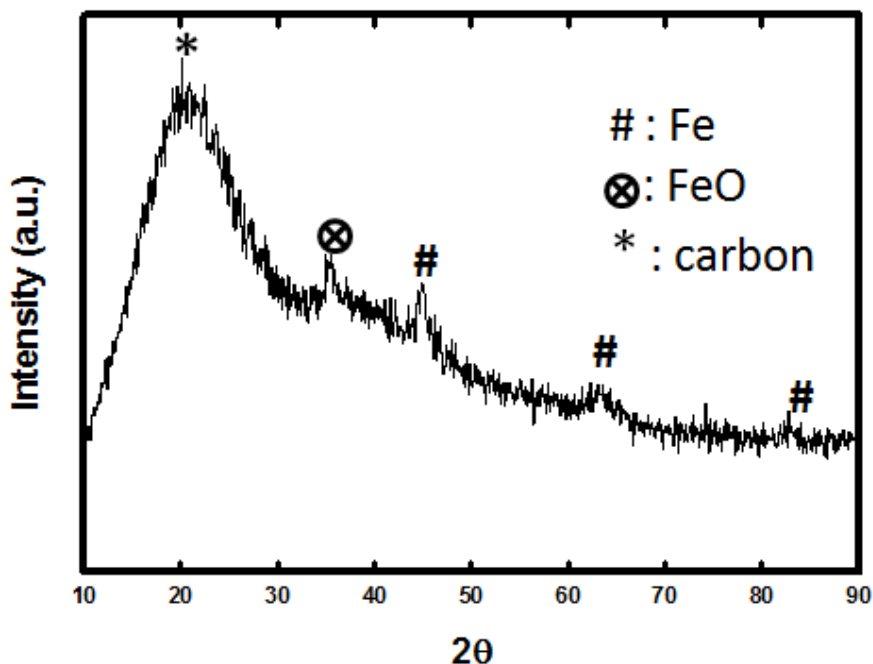

Figure S1: XRD patterns of aerosol-based Fe/ C particles.

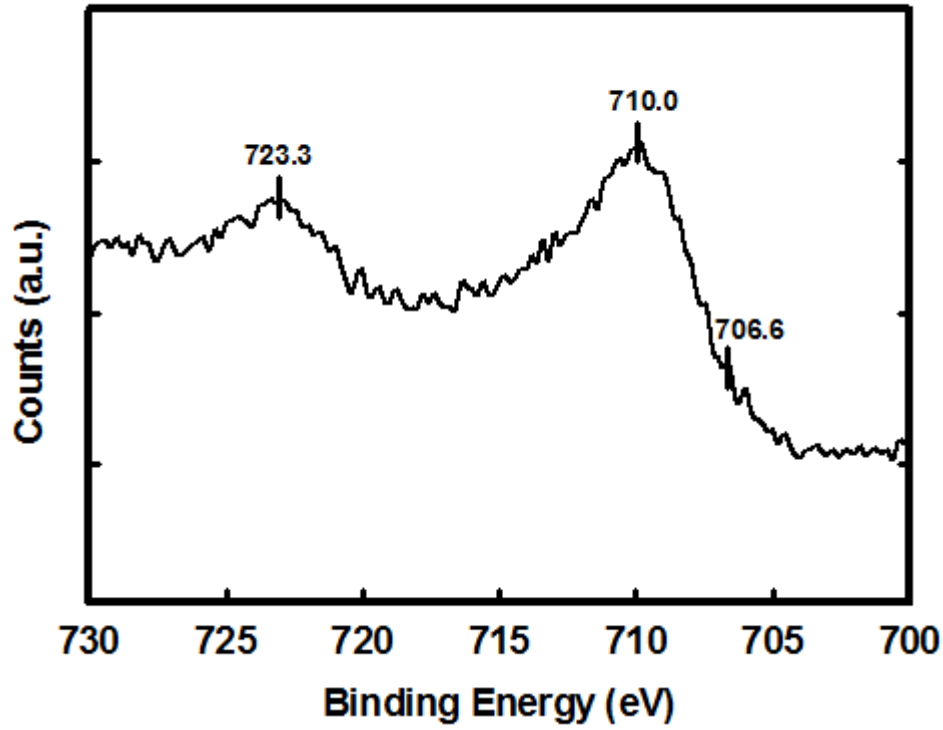

Figure S2: XPS response of Fe 2p core levels of aerosol-based Fe/ C particles.

### Partitioning Characteristics

We have calculated the partition coefficient for TCE adsorption on the aerosol-based Fe/C particles using the definition of Phenrat and coworkers (3):

$$\frac{C_{TCE}^{ads}}{C_{TCE}^{water}} = K_p$$

$$= \left\{ \frac{\left[ (C_{TCE}^{Air})_{ref} V_{hs} - (C_{TCE}^{Air})_{ads} V_{hs} \right] + \left[ \left( \frac{C_{TCE}^{Air}}{K_H^{TCE*}} V_{water} \right)_{ref} - \left( \frac{C_{TCE}^{Air}}{K_H^{TCE*}} V_{water} \right)_{ads} \right]}{\left( \frac{M_p}{\rho_p} \right) \left( \frac{C_{TCE}^{Air}}{K_H^{TCE*}} \right)_{ads}} \right\}$$

Where  $C_{TCE}^{ads}$  is the concentration of TCE on the adsorbent (mol/L),  $C_{TCE}^{water}$  is the concentration of TCE in the water phase (mol/L),  $C_{TCE}^{Air}$  is the concentration of TCE in the

headspace (mol/L),  $V_{hs}$  and  $V_{water}$  are the volumes of the headspace and water, respectively (L),  $M_{ads}$  is the mass of the adsorbent (g),  $\rho_{ads}$  is the density of the adsorbent (g/L). The subscripts *ref* and *ads* refer to the system without and with the adsorbent.  $K_H^{TCE*}$  is the Henry's law constant for TCE partitioning in water, with a value of 0.343 at 25°C (4). By this equation, the measured partition coefficient for TCE adsorption on humic acid is 85, while  $K_p$  for the adsorption of TCE on aerosol-based Fe/C composites is 1560, an 18.3 fold increase in adsorption capacity.

### ***Calculations of sticking coefficient ( $\alpha$ )***

The sticking coefficient ( $\alpha$ ), representing the fraction of contacts between particles and collectors that result in attachment, is calculated from capillary column breakthrough data using the following equation (5, 6):

$$\alpha = \frac{-2d_c \ln(C/C_0)}{3(1-f)\eta_0 L}$$

Where  $d_c$ : the average diameter of sand grains;

$C$  and  $C_0$  are effluent and influent particle concentration;

$f$ : the porosity of the sand grains;

$L$ : the length of the column;

$\eta_0$ : the single-collector efficiency, which can be calculated by Tufenkji-Elimelech

(T-E) equation as the following (5):

$$\eta_0 = 2.4A_S^{1/3} N_R^{-0.081} N_{Pe}^{-0.715} N_{vdW}^{0.052} + 0.55A_S N_R^{1.675} N_A^{0.125} + 0.22N_R^{-0.24} N_G^{1.11} N_{vdW}^{0.053}$$

We calculated the sticking coefficient based on the following conditions:

Porosity,  $f = 0.32$ , as measured by comparing the weight of the dry column with that of the water saturated column (7, 8).

Sand size:  $d_c = 500 \mu\text{m}$ . Ottawa sand has a board size distribution from  $100 \mu\text{m}$  to  $900 \mu\text{m}$  based on the observation by the optical microscopy (Olympus IX71, Japan). Here, we use the average size  $500 \mu\text{m}$  in the calculation.

Absolute fluid viscosity,  $\mu = 1.0 \times 10^{-3} \text{ N.s/m}^2$

Boltzman constant,  $k = 1.38065 \times 10^{-23} \text{ J/K}$

Temperature,  $T = 298 \text{ K}$

Hamaker constant (9),  $H = 1.09 \times 10^{-19} \text{ J}$

Particle size:  $d_p = 500 \text{ nm}$

Volumetric flow rate  $= 0.1 \text{ mL/min} = 8.3 \times 10^{-4} \text{ m/s}$

$$\begin{aligned} \text{Density of Fe/carbon particles} &= \frac{\text{mass of Fe/carbon}}{\text{volume of Fe/carbon}} \\ &= \frac{\text{mass of Fe/carbon}}{\text{volume of Fe} + \text{volume of carbon}} = \frac{1\text{g}}{\frac{15\% * 1\text{g}}{7.8\text{g/mL}} + \frac{85\% * 1\text{g}}{2.26\text{g/mL}}} \\ &= 2.5\text{g/mL} = 2.5 * 10^3 \text{ kg/m}^3 \end{aligned}$$

(Density of carbon particles (10),  $\rho = 2.26 \text{ gm/mL} = 2.26 \times 10^3 \text{ kg/m}^3$ )

With 97% of particles eluted from the column ( $C/C_0 = 0.97$ ) the calculated sticking coefficient is 0.09.

## References:

1. Sheng, Z. M.; Wang, J. N., Thin-walled carbon nanocages: direct growth, characterization, and applications. *Adv. Mater.* **2008**, *20* (5), 1071-1075.
2. Sun, Y. P.; Li, X. Q.; Cao, J.; Zhang, W. X.; Wang, H. P., Characterization of zero-valent iron nanoparticles. *Adv. Colloid Interface Sci.* **2006**, *120*, 47.

3. Phenrat, T.; Liu, Y.; Tilton, R. D.; Lowry, G. V., Adsorbed polyelectrolyte coatings decrease Fe(0) nanoparticle reactivity with TCE in water: conceptual model and mechanisms. *Environ. Sci. Technol.* **2009**, *43* (5), 1507-1514.
4. Heron, G.; Christensen, T. H.; Enfield, C. G., Henry's Law Constant for Trichloroethylene between 10 and 95 °C. *Environ. Sci. Technol.* **1998**, *32* (10), 1433-1437.
5. Tufenkji, N.; Elimelech, M., Correlation equation for predicting single-collector efficiency in physicochemical filtration in saturated porous media. *Environ. Sci. Technol.* **2004**, *38* (2), 529.
6. Saleh, N.; Kim, H.; Phenrat, T.; Matyjaszewski, K.; Tilton, R. D.; Lowry, G. V., Ionic strength and composition affect the mobility of surface-modified Fe0 nanoparticles in water-saturated sand columns. *Environ. Sci. Technol.* **2008**, *42*, 3349.
7. Schrick, B.; Hydutsky, B. W.; Blough, J. L.; Mallouk, T. E., Delivery vehicles for zerovalent metal nanoparticles in soil and groundwater. *Chem. Mater.* **2004**, *16*, 2187.
8. Zhan, J.; Zheng, T.; Piringier, G.; Day, C.; McPherson, G. L.; Lu, Y.; Papadopoulos, K.; John, V. T., Transport Characteristics of Nanoscale Functional Zerovalent Iron/Silica Composites for in Situ Remediation of Trichloroethylene. *Environ. Sci. Technol.* **2008**, *42* (23), 8871-8876.
9. Hartley, P. A.; Parfitt, G. D., Dispersion of powders in liquids. 1. The contribution of the van der Waals force to the cohesiveness of carbon black powders. *Langmuir* **1985**, *1* (6), 651-657.
10. Ma, A.; Wang, X.; Li, T.; Liu, X.; Xu, B., Characteristics of carbon microspheres and study on its adsorption isotherms. *Mater. Sci. Eng. A* **2007**, *443*, 54-59.
